# Supplementary material for: In Situ DRIFTS Study of Single-Atom, 2D, and 3D Pt on γ-Al2O3 Nanoflakes and Nanowires for C2H4 Oxidation
Source: MDPI journal article supplement (doi:10.3390/pr10091773), 2022-09-04
Supplement: s1 [file s1]

Archive with 1 entries (1 files):
- processes-1894083-supplementary.pdf
