# Supplementary material for: In Situ DRIFTS Study of Single-Atom, 2D, and 3D Pt on γ-Al2O3 Nanoflakes and Nanowires for C2H4 Oxidation
Source: MDPI journal article supplement (doi:10.3390/pr10091773), 2022-09-04
Supplement: s1 [file s1 › processes-1894083-supplementary.pdf]

## Supplementary Material

# In Situ DRIFTS Study of Single-Atom, 2D, and 3D Pt on $\gamma$ -Al<sub>2</sub>O<sub>3</sub> Nanoflakes and Nanowires for C<sub>2</sub>H<sub>4</sub> Oxidation

Shengpan Peng <sup>1,†</sup>, Ziran Ma <sup>1,†</sup>, Jing Ma <sup>1</sup>, Hongyan Wang <sup>1</sup>, Kai Ren <sup>1</sup>, Xiaodong Wu <sup>2</sup> and Baodong Wang <sup>1,\*</sup>

<sup>1</sup> National Institute of Clean-and-Low-Carbon Energy, Beijing 102211, China

<sup>2</sup> Key Laboratory of Advanced Materials of Ministry of Education, School of Materials Science and Engineering, Tsinghua University, Beijing 100084, China

\* Correspondence: baodong.wang.d@chnenergy.com.cn; Tel.: +86-010-57339633

† These authors contributed equally to this work.

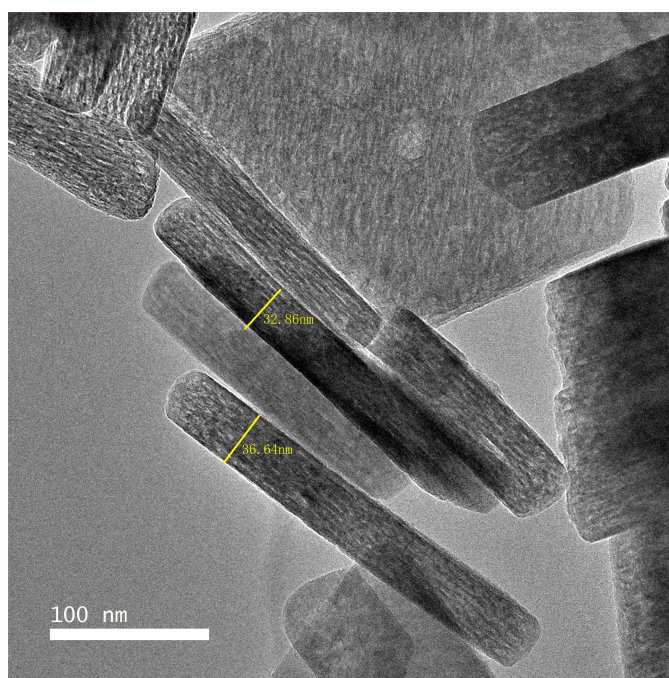

**Figure S1.** TEM images of synthesized  $\gamma$ -Al<sub>2</sub>O<sub>3</sub> (Al-NF).

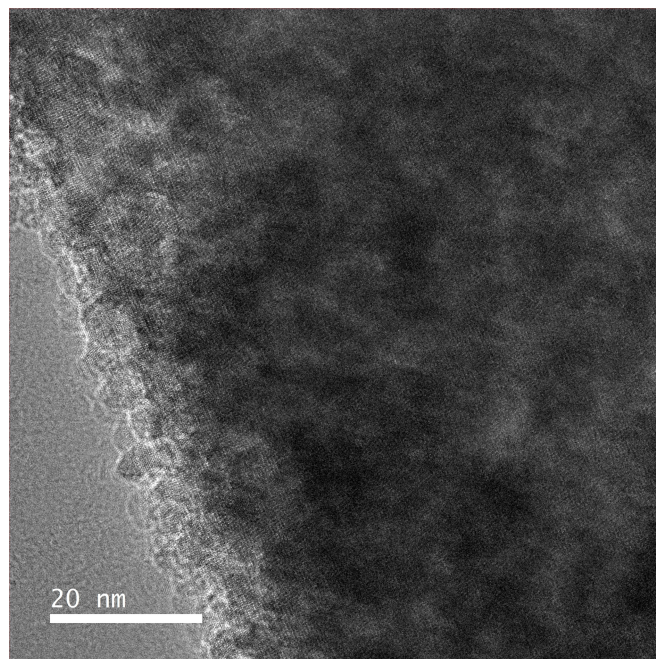

**Figure S2.** HRTEM images of synthesized  $\gamma$ -Al<sub>2</sub>O<sub>3</sub> (Al-NF). The nanoflakes in sample Al-NF were composed of aggregated crystalline grains with sizes of around 10 nm, which fused to form nanoflakes.

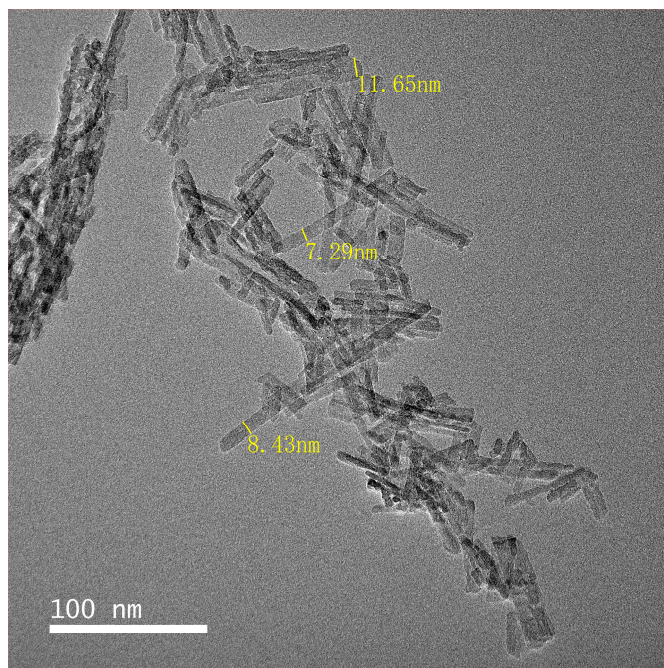

**Figure S3.** TEM images of synthesized  $\gamma$ -Al<sub>2</sub>O<sub>3</sub> (Al-NW).

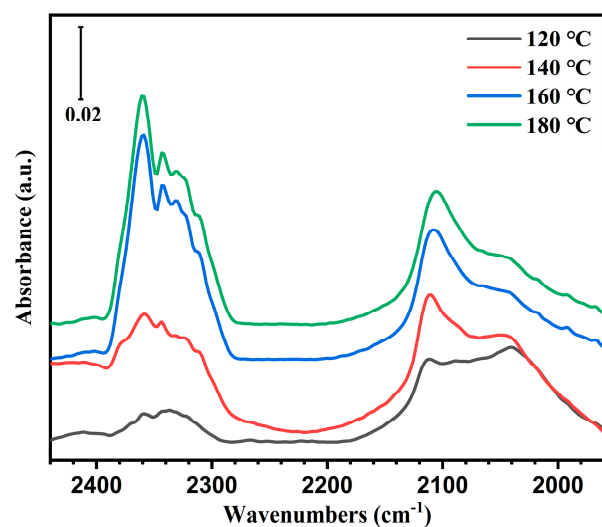

**Figure S4.** In situ DRIFTS spectra over PtAl-NW at temperatures from 120 to 180 °C. Reaction conditions: 700 ppm C<sub>2</sub>H<sub>4</sub>, 10% O<sub>2</sub>, N<sub>2</sub> balance, 17 mg catalyst, 50 ml min<sup>-1</sup> flow rate.

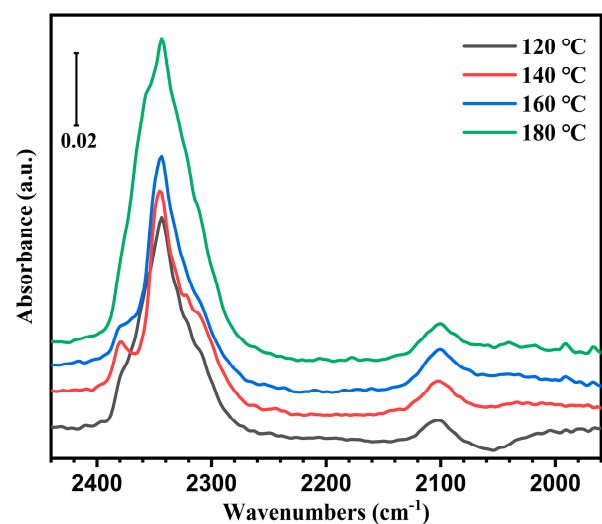

**Figure S5.** In situ DRIFTS spectra over PtAl-NF at temperatures from 120 to 180 °C. Reaction conditions: 700 ppm C<sub>2</sub>H<sub>4</sub>, 10% O<sub>2</sub>, N<sub>2</sub> balance, 17 mg catalyst, 50 ml min<sup>-1</sup> flow rate.

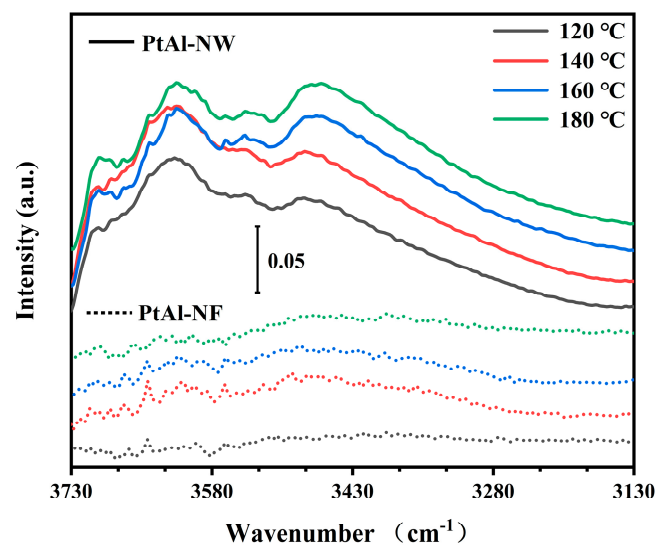

**Figure S6.** In situ DRIFTS spectra over Pt/γ-Al<sub>2</sub>O<sub>3</sub> at temperatures from 120 to 180 °C. Reaction conditions: 700 ppm C<sub>2</sub>H<sub>4</sub>, 10% O<sub>2</sub>, N<sub>2</sub> balance, 17 mg catalyst, 50 ml min<sup>-1</sup> flow rate.
